# Supplementary material for: Genomic Polymorphism Associated with the Emergence of Virulent Isolates of Mycobacterium bovis in the Nile Delta
Source: PubMed Central journal article supplement (PMC6690966; doi:10.1038/s41598-019-48106-3), 2019-08-12
Supplement: 41598_2019_48106_MOESM1_ESM.pdf [file 41598_2019_48106_MOESM1_ESM.pdf]

**Genomic Polymorphism Associated with the Emergence of Virulent Isolates of  
*Mycobacterium bovis* in the Nile Delta.**

**Hazem F M Abdelaal<sup>1</sup>, Daniel Spalink<sup>2</sup>, Ali Amer<sup>3</sup>, Howard Steinberg<sup>1</sup>, Emad A Hashish<sup>4</sup>, Essam A  
Nasr<sup>5</sup>, Adel M Talaat<sup>1\*</sup>**

<sup>1</sup>Department of Pathobiological Sciences, University of Wisconsin-Madison, Madison, WI, USA.

<sup>2</sup>Department of Ecosystem Science and Management, Texas A&M University, College Station, TX, USA.

<sup>3</sup>Animal Health Research Institute, Dokki, Giza, Egypt.

<sup>4</sup>Department of Clinical Pathology, Faculty of Veterinary Medicine, Zagazig University, Zagazig, Egypt.

<sup>5</sup>Veterinary Serum and Vaccine Research Institute, Bacterial Diagnostics Research Department  
(Tuberculosis), Abbasia, Cairo, Egypt.

Running Head: Molecular Diversity of *M. bovis* Isolates from Egypt

#Address correspondence to:

Adel M. Talaat, M.V.Sc., Ph.D.

Lab of Bacterial Genomics

Department of Pathobiological Sciences

School of Veterinary Medicine

University of Wisconsin-Madison

Robert P Hanson Biomedical Science Laboratories

1656 Linden Drive, Madison, WI 53706-1581

Tel: 608-262-2861

Fax: 608-262-7420

[adel.talaat@wisc.edu](mailto:adel.talaat@wisc.edu)

1 **Supplemental Table 1. List of 137 virulence related genes<sup>1</sup> predicted in the *Mycobacterium***  
 2 ***bovis* reference genome (*M. bovis* AF2122/97) used for the calculation of *dN/dS* ratios in the**  
 3 ***M. bovis* isolates from the Nile Delta.**

| #  | Gene Name | Rv number | Mb number |
|----|-----------|-----------|-----------|
| 1  | treS      | Rv0126    | Mb0131    |
| 2  | ptbB      | Rv0153c   | Mb0158c   |
| 3  | mce1r     | Rv0165    | Mb0170c   |
| 4  | fadD5     | Rv0166c   | Mb0172c   |
| 5  | sigG      | Rv0182c   | Mb0188c   |
| 6  | zmp1      | Rv0198c   | Mb0204c   |
| 7  | pckA      | Rv0211    | Mb0217    |
| 8  | hsp       | Rv0251c   | Mb0257c   |
| 9  | mosR      | Rv0348    | Mb0356    |
| 10 | hspR      | Rv0353    | Mb0361    |
| 11 | pknG      | Rv0410c   | Mb0418c   |
| 12 | sodC      | Rv0432    | Mb0440    |
| 13 | icl1      | Rv0467    | Mb0467    |
| 14 | pcaA      | Rv0470c   | Mb0479c   |
| 15 | hbhA      | Rv0475    | Mb0485    |
| 16 | -         | Rv0485    | Mb0495    |
| 17 | senX3     | Rv0490    | Mb0500    |
| 18 | regX3     | Rv0491    | Mb0501    |
| 19 | mce2r     | Rv0586    | Mb0601    |
| 20 | mmaA4     | Rv0642c   | Mb0661c   |
| 21 | mmaA3     | Rv0643c   | Mb0662c   |
| 22 | mmaA2     | Rv0644c   | Mb0663c   |
| 23 | mmaA1     | Rv0645c   | Mb0664c   |
| 24 | sigL      | Rv0735    | Mb0756    |
| 25 | phoP      | Rv0757    | Mb0780    |
| 26 | phoR      | Rv0758    | Mb0781    |
| 27 | phoT      | Rv0820    | Mb0843    |
| 28 | phoY2     | Rv0821c   | Mb0844c   |
| 29 | ompA      | Rv0899    | Mb0923    |
| 30 | pstA1     | Rv0930    | Mb0953    |
| 31 | pknDb     | Rv0931c   | Mb0954c   |
| 32 | pstS-1    | Rv0934    | Mb0959    |
| 33 | ctpV      | Rv0969    | Mb0994    |
| 34 | mprA      | Rv0981    | Mb1007    |
| 35 | mprB      | Rv0982    | Mb1008    |
| 36 | pepD      | Rv0983    | Mb1009    |

|    |             |         |         |
|----|-------------|---------|---------|
| 37 | hsp22.5     | Rv0990c | Mb1017c |
| 38 | sigE        | Rv1221  | Mb1253  |
| 39 | lpqY        | Rv1235  | Mb1267  |
| 40 | fadD33      | Rv1345  | Mb1380  |
| 41 | irtA        | Rv1348  | Mb1383  |
| 42 | irtB        | Rv1349  | Mb1384  |
| 43 |             | Rv1410c | Mb1445c |
| 44 | lprG        | Rv1411c | Mb1446c |
| 45 | pks5        | Rv1527c | Mb1554c |
| 46 | lspA        | Rv1539  | Mb1566  |
| 47 | pks10       | Rv1660  | Mb1688  |
| 48 | pks7        | Rv1661  | Mb1689  |
| 49 | pknE        | Rv1743  | Mb1772  |
| 50 | plcD        | Rv1755c | Mb1784c |
| 51 | eccD5       | Rv1795  | Mb1823  |
| 52 | mgtC        | Rv1811  | Mb1841  |
| 53 | secA2       | Rv1821  | Mb1852  |
| 54 | modA        | Rv1857  | Mb1888  |
| 55 | katG        | Rv1908c | Mb1943c |
| 56 | -           | Rv1931c | Mb1966c |
| 57 | tpX         | Rv1932  | Mb1967  |
| 58 | mel2        | Rv1936  | Mb1971  |
| 59 | yrbE3A      | Rv1964  | Mb1999  |
| 60 | -           | Rv1979c | Mb2001c |
| 61 | mpt64       | Rv1980c | Mb2002c |
| 62 | nrdF1       | Rv1981c | Mb2003c |
| 63 | vapC36      | Rv1982  | Mb2004c |
| 64 | dosT        | Rv2027c | Mb2052c |
| 65 | acr1 (hspX) | Rv2031c | Mb2057c |
| 66 | acg         | Rv2032  | Mb2058  |
| 67 | pks12       | Rv2048c | Mb2074c |
| 68 | sigC        | Rv2069  | Mb2095  |
| 69 | pafA        | Rv2097c | Mb2124c |
| 70 | mpa         | Rv2115c | Mb2139c |
| 71 | -           | Rv2136c | Mb2160c |
| 72 | ctaC        | Rv2200c | Mb2223c |
| 73 | caeA        | Rv2224c | Mb2248c |
| 74 | ptpA        | Rv2234  | Mb2258  |
| 75 | kasB        | Rv2246  | Mb2270  |
| 76 | mbtB        | Rv2383c | Mb2404c |

|     |        |         |         |
|-----|--------|---------|---------|
| 77  | aprA   | Rv2395a | Mb2417a |
| 78  | aprB   | Rv2395b | Mb2417b |
| 79  | ahpC   | Rv2428  | Mb2454  |
| 80  | ndk    | Rv2445c | Mb2472c |
| 81  | sigA   | Rv2703  | Mb2722  |
| 82  | ideR   | Rv2711  | Mb2730  |
| 83  | clgR   | Rv2745c | Mb2766c |
| 84  | -      | Rv2869c | Mb2894c |
| 85  | rip    | Rv2869c | Mb2894c |
| 86  | fadD26 | Rv2930  | Mb2955  |
| 87  | drrC   | Rv2938  | Mb2963  |
| 88  | fadD28 | Rv2941  | Mb2966  |
| 89  | mmpL7  | Rv2942  | Mb2967  |
| 90  | lppX   | Rv2945c | Mb2970c |
| 91  | pksI   | Rv2947c | Mb2971c |
| 92  | virS   | Rv3082c | Mb3109c |
| 93  | devR   | Rv3133c | Mb3157c |
| 94  | nuoG   | Rv3151  | Mb3175  |
| 95  | sigH   | Rv3223c | Mb3250c |
| 96  | kefB   | Rv3236c | Mb3264c |
| 97  | ctpC   | Rv3270  | Mb3298  |
| 98  | sigF   | Rv3286c | Mb3314c |
| 99  | choD   | Rv3409c | Mb3443c |
| 100 | sigD   | Rv3414c | Mb3448c |
| 101 | whiB3  | Rv3416  | Mb3450  |
| 102 | yrb4A  | Rv3501c | Mb3531c |
| 103 | ltp2   | Rv3540c | Mb3570c |
| 104 | -      | Rv3541c | Mb3571c |
| 105 | -      | Rv3542c | Mb3572c |
| 106 | fadE29 | Rv3543c | Mb3573c |
| 107 | fadE28 | Rv3544c | Mb3574c |
| 108 | cyp125 | Rv3545c | Mb3575c |
| 109 | hsaC   | Rv3568c | Mb3599c |
| 110 | espD   | Rv3614c | Mb3644c |
| 111 | espC   | Rv3615c | Mb3645c |
| 112 | -      | Rv3654c | Mb3678c |
| 113 | -      | Rv3655c | Mb3679c |
| 114 | dppA   | Rv3666c | Mb3690c |
| 115 | -      | Rv3671c | Mb3695c |
| 116 | ponA2  | Rv3682  | Mb3707  |

|     |        |         |         |
|-----|--------|---------|---------|
| 117 | lpqH   | Rv3763  | Mb3789  |
| 118 | fbpA   | Rv3804c | Mb3834c |
| 119 | pirG   | Rv3810  | Mb3840  |
| 120 | mmpL8  | Rv3823c | Mb3853c |
| 121 | espR   | Rv3849  | Mb3879  |
| 122 | espF   | Rv3865  | Mb3895  |
| 123 | espH   | Rv3867  | Mb3897  |
| 124 | eccA1  | Rv3868  | Mb3898  |
| 125 | eccB1  | Rv3869  | Mb3899  |
| 126 | eccCA1 | Rv3870  | Mb3900  |
| 127 | eccCB1 | Rv3871  | Mb3901  |
| 128 | PE35   | Rv3872  | Mb3902  |
| 129 | PPE68  | Rv3873  | Mb3903  |
| 130 | esxB   | Rv3874  | Mb3904  |
| 131 | esxB   | Rv3874  | Mb3904  |
| 132 | esxA   | Rv3875  | Mb3905  |
| 133 | esxA   | Rv3875  | Mb3905  |
| 134 | eccD1  | Rv3877  | Mb3907  |
| 135 | eccD1  | Rv3877  | Mb3907  |
| 136 | mycP1  | Rv3883c | Mb3913c |
| 137 | mycP1  | Rv3883c | Mb3913c |

5 **Supplemental Table 2. List of 67 *M. bovis* genomes retrieved from the NCBI public**  
6 **database used in the comparative genomic analysis of *M. bovis* isolates from the Nile Delta.**

| Used acronym                                                  | Accession number | Species                                             | Strain         | Contigs | %GC   | Isolation date | Country     | Host                   |
|---------------------------------------------------------------|------------------|-----------------------------------------------------|----------------|---------|-------|----------------|-------------|------------------------|
| M.Africanum-Gm041182                                          | NC_015758.1      | <i>Mycobacterium tuberculosis</i> var. africanum    | GM041182       | 1       | 65.60 | 1968           | West Africa | <i>Homo sapiens</i>    |
| M.Canettii-Cipt-140010059                                     | NC_015848.1      | <i>Mycobacterium canettii</i>                       | CIPT-140010059 | 1       | 65.40 | 1997           | Somalia     | <i>Homo sapiens</i>    |
| M.Caprae_Allgaeu                                              | NZ_CP016401.1    | <i>Mycobacterium tuberculosis</i> var. caprae       | Allgaeu        | 1       | 65.60 | 1999           | Spain       | <i>Sheep, Ovis sp.</i> |
| M.Tb-Haarlem_V2                                               | NC_022350.1      | <i>Mycobacterium tuberculosis</i> var. tuberculosis | Haarlem        | 1       | 65.60 | 2005           | USA         | <i>Homo sapiens</i>    |
| M.Tb-CDC1551                                                  | NC_002755.2      | <i>Mycobacterium tuberculosis</i> var. tuberculosis | CDC1551        | 1       | 65.60 | 2002           | USA         | <i>Homo sapiens</i>    |
| M.Tb-H37ra                                                    | NC_009525.1      | <i>Mycobacterium tuberculosis</i> var. tuberculosis | H37Ra          | 1       | 65.60 | 1934           | USA         | <i>Homo sapiens</i>    |
| M.Tb-H37rv                                                    | NC_000962.3      | <i>Mycobacterium tuberculosis</i> var. tuberculosis | H37Rv          | 1       | 65.60 | 1934           | USA         | <i>Homo sapiens</i>    |
| Mb-04-303-Argentina.La.Pampa-2004-Wild.Boar                   | NZ_AVSW0000000.1 | <i>Mycobacterium tuberculosis</i> var. bovis        | 04-303         | 169     | 65.52 | 2004           | Argentina   | <i>Pig, Sus scrofa</i> |
| Mb-05-566-Argentina.Buenos.Aires-2000-Cattle                  | NZ_JPFR0000000.1 | <i>Mycobacterium tuberculosis</i> var. bovis        | 05-566         | 89      | 65.50 | 2000           | Argentina   | <i>Bovine, Bovinae</i> |
| Mb-05-567-Argentina.Buenos.Aires-2000-Cattle                  | NZ_JPFQ0000000.1 | <i>Mycobacterium tuberculosis</i> var. bovis        | 05-567         | 69      | 65.57 | 2000           | Argentina   | <i>Bovine, Bovinae</i> |
| Mb-08-08bf2-Brazil.Sao.Paulo.Boituva-2008-Cattle              | NZ_JQET0000000.1 | <i>Mycobacterium tuberculosis</i> var. bovis        | 08-08BF2       | 108     | 65.52 | 2008           | Brazil      | <i>Bovine, Bovinae</i> |
| Mb-0822-11-Brazil.Sao.Paulo.Porangaba-2012-Cattle             | NZ_JQEW0000000.1 | <i>Mycobacterium tuberculosis</i> var. bovis        | 0822-11        | 85      | 65.54 | 2012           | Brazil      | <i>Bovine, Bovinae</i> |
| Mb-09-1191-Argentina.Buenos.Aires.Balcarce-2009-Cattle        | NZ_JPFP0000000.1 | <i>Mycobacterium tuberculosis</i> var. bovis        | 09-1191        | 86      | 65.57 | 2009           | Argentina   | <i>Bovine, Bovinae</i> |
| Mb-09-1193-Argentina.Buenos.Aires.Trenque.Lauquen-2009-Cattle | NZ_JQEN0000000.1 | <i>Mycobacterium tuberculosis</i> var. bovis        | 09-1193        | 89      | 65.50 | 2009           | Argentina   | <i>Bovine, Bovinae</i> |
| Mb-1595-S.Korea-2015-Cattle                                   | NZ_CP012095.1    | <i>Mycobacterium tuberculosis</i> var. bovis        | 1595           | 1       | 65.64 | 2012           | Korea       | <i>Cattle, Bos sp.</i> |
| Mb-18-08c-Brazil.Paran.Palmeiras-2008-Cattle                  | NZ_JQEQ0000000.1 | <i>Mycobacterium tuberculosis</i> var. bovis        | 18-08C         | 63      | 65.58 | 2008           | Brazil      | <i>Bovine, Bovinae</i> |

|                                                                           |                       |                                                    |                           |     |       |      |           |                                            |
|---------------------------------------------------------------------------|-----------------------|----------------------------------------------------|---------------------------|-----|-------|------|-----------|--------------------------------------------|
| Mb-32-08-<br>Brazil.Minas.Gerais.Uberlandia-2008-<br>Cattle               | NZ_JQER000<br>00000.1 | Mycobacterium<br>tuberculosis var.<br>bovis        | 32-08                     | 83  | 65.56 | 2008 | Brazil    | Bovine, Bovinae                            |
| Mb-35-<br>Brazil.Mato.Grosso.Do.Sul.Dois.Irmaos.D<br>o.Buriti-2003-Cattle | NZ_JQEV000<br>00000.1 | Mycobacterium<br>tuberculosis var.<br>bovis        | 35                        | 94  | 65.60 | 2003 | Brazil    | Bovine, Bovinae                            |
| Mb-45-08b-Brazil.Minas.Gerais.Arax-<br>2008-Cattle                        | NZ_JQEP000<br>00000.1 | Mycobacterium<br>tuberculosis var.<br>bovis        | 45-08B                    | 72  | 65.55 | 2008 | Brazil    | Bovine, Bovinae                            |
| Mb-49-09-<br>Brazil.Sao.Paulo.Presidente.Venceslau-<br>2009-Cattle        | NZ_JQES000<br>00000.1 | Mycobacterium<br>tuberculosis var.<br>bovis        | 49-09                     | 61  | 65.59 | 2009 | Brazil    | Bovine, Bovinae                            |
| Mb-50-Brazil.Acre.Tarauac-Sep2014-<br>Cattle                              | NZ_JQEU000<br>00000.1 | Mycobacterium<br>tuberculosis var.<br>bovis        | 50                        | 84  | 65.55 | 2009 | Brazil    | Bovine, Bovinae                            |
| Mb-534-Argentina.Santa.Fe.Las.Colonias-<br>1994-Cattle                    | NZ_JQEM000<br>00000.1 | Mycobacterium<br>tuberculosis var.<br>bovis        | 534                       | 72  | 65.56 | 1994 | Argentina | Bovine, Bovinae                            |
| Mb-61-09-<br>Brazil.Sao.Paulo.Novo.Castilho-2009-<br>Sheep                | NZ_JQEX000<br>00000.1 | Mycobacterium<br>tuberculosis var.<br>bovis        | 61-09                     | 68  | 65.59 | 2009 | Brazil    | Sheep, <i>Ovis</i> sp.                     |
| Mb-Af2122.97                                                              | NC_002945.3           | Mycobacterium<br>tuberculosis var.<br>bovis        | AF2122/97                 | 1   | 65.60 | 1997 | UK        | Bovine, Bovinae                            |
| Mb-An5-Brazil-2014-Cattle                                                 | NZ_AWPL00<br>000000.1 | Mycobacterium<br>tuberculosis var.<br>bovis        | AN5                       | 70  | 65.60 | 1948 | UK        | Cattle, <i>Bos</i> sp.                     |
| Mb-Atcc-Baa-935-Usa-Sep2014                                               | NZ_CP00944<br>9.1     | Mycobacterium<br>tuberculosis var.<br>bovis        | BAA-935                   | 1   | 65.61 | 1997 | UK        | Cattle, <i>Bos<br/>primigenius</i>         |
| Mb-B-3222-S.Korea.Hongseong-2013-<br>Cattle                               | NZ_LNOF000<br>00000.1 | Mycobacterium<br>tuberculosis var.<br>bovis        | B-3222                    | 56  | 65.60 | 2018 | S.Korea   | Cattle, <i>Bos<br/>taurus</i>              |
| Mb-B2.7505-Uganda-Oct2006-Human                                           | NZ_JKAL000<br>00000.1 | Mycobacterium<br>tuberculosis var.<br>tuberculosis | B2.7505                   | 243 | 65.50 | 2006 | Uganda    | Human, <i>Homo<br/>sapiens</i>             |
| Mb-Bcg-Atcc-35743-Beijing-2011                                            | NZ_CP00349<br>4.1     | Mycobacterium<br>tuberculosis var.<br>bovis        | BCG-<br>63839             | 1   | 65.70 | 2011 | Beijing   | Elk, <i>Cervus<br/>canadensis</i>          |
| Mb-Bcg-Mexico1931-2010                                                    | NC_016804.1           | Mycobacterium<br>tuberculosis var.<br>bovis - BCG  | BCG-<br>Mexico193<br>1    | 1   | 65.70 | 2010 | Mexico    | Cattle, <i>Bos</i> sp.                     |
| Mb-Bcg-Moreau-Rdj-2016                                                    | NZ_AM41205<br>9.1     | Mycobacterium<br>tuberculosis var.<br>bovis - BCG  | BCG-<br>Moreau-<br>RDJ    | 1   | 65.70 | 2016 | Brazil    | Cattle, <i>Bos<br/>taurus</i>              |
| Mb-Bcg-Pasteur1173p2-2007                                                 | NC_008769.1           | Mycobacterium<br>tuberculosis var.<br>bovis - BCG  | BCG-<br>Pasteur117<br>3P2 | 1   | 65.70 | 2007 | France    | Deer,<br><i>Odocoileus<br/>virginianus</i> |
| Mb-BCG-Russia-2015                                                        | NZ_CP01374<br>1.1     | Mycobacterium<br>tuberculosis var.<br>bovis - BCG  | BCG-<br>Russia            | 1   | 65.70 | 2015 | Russia    | Deer,<br><i>Odocoileus<br/>virginianus</i> |
| Mb-Bcg-Tokyo172-2008                                                      | NZ_CP01456<br>6.1     | Mycobacterium<br>tuberculosis var.<br>bovis - BCG  | BCG-<br>Tokyo172          | 1   | 65.70 | 2008 | Tokyo     | Deer,<br><i>Odocoileus<br/>virginianus</i> |

|                                               |                       |                                                   |                     |     |       |      |         |                                |
|-----------------------------------------------|-----------------------|---------------------------------------------------|---------------------|-----|-------|------|---------|--------------------------------|
| Mb-Bcg3281-China-2015                         | NZ_CP00874<br>4.1     | Mycobacterium<br>tuberculosis var.<br>bovis - BCG | BCG3281             | 1   | 65.70 | 2015 | China   | <i>Cattle, Bos<br/>taurus</i>  |
| Mb-Bcg368-Russia-2014                         | NZ_CP00924<br>3.1     | Mycobacterium<br>tuberculosis var.<br>bovis - BCG | BCG368              | 1   | 65.70 | 2014 | Russia  | <i>Cattle, Bos<br/>taurus</i>  |
| Mb-Bz.31150-Uganda-Jun2007-Human              | NZ_JKAM00<br>000000.1 | Mycobacterium<br>tuberculosis var.<br>bovis       | Bz.31150-<br>Uganda | 141 | 65.50 | 2007 | Uganda  | <i>Human, Homo<br/>sapiens</i> |
| Mb-MB1-Spain-2015-Cattle                      | NZ_CDHF00<br>000000.1 | Mycobacterium<br>tuberculosis var.<br>bovis       | MB1                 | 47  | 65.50 | 2015 | Spain   | <i>Cattle, Bos<br/>taurus</i>  |
| Mb-Mb3-Spain-2015-Wild.Boar                   | NZ_CDHH00<br>000000.1 | Mycobacterium<br>tuberculosis var.<br>bovis       | MB3                 | 88  | 65.50 | 2015 | Spain   | <i>Pig, Sus scrofa</i>         |
| Mb-Mb4-Spain-2015-Wild.Boar                   | NZ_CDHE00<br>000000.1 | Mycobacterium<br>tuberculosis var.<br>bovis       | MB4                 | 109 | 65.50 | 2015 | Spain   | <i>Pig, Sus scrofa</i>         |
| Mb-Mburu-001-Uruguay.San.Jose-2014-<br>Cattle | NZ_LFGY000<br>00000.1 | Mycobacterium<br>tuberculosis var.<br>bovis       | MbURU-<br>001       | 100 | 65.50 | 2014 | Uruguay | <i>Cattle, Bos<br/>taurus</i>  |
| Mb-Sp38-Brazil.Sao.Paulo-2015                 | NZ_CP01577<br>3.1     | Mycobacterium<br>tuberculosis var.<br>bovis       | SP38                | 1   | 65.50 | 2015 | Brazil  |                                |
| Mb-W-1171-S.Korea-Jun2014-Wild.Boar           | JXTK0000000<br>0      | Mycobacterium<br>tuberculosis var.<br>bovis       | W-1171              | 50  | 65.50 | 2014 | S.Korea | <i>Pig, Sus scrofa</i>         |



8 **Supplemental Table 3. List of 27 SNPs predicted to be uniquely associated with MBE4**  
 9 **used for genotype comparison between MBE4, MBE5 and MBE7 relative to the reference**  
 10 **virulence strain of *M. bovis*.**  
 11

**SNPs uniquely present in MBE4**

| #  | Reference position | Reference allele | MBE4 | MBE5 | MBE7 | Annotation                 | SNP type       | Amino acid change |
|----|--------------------|------------------|------|------|------|----------------------------|----------------|-------------------|
| 1  | 339620             | C                | G    | C    | C    | BQ2027_MB0287c / PE_PGRS4  | synonymous     |                   |
| 2  | 1165589            | T                | C    | T    | T    | BQ2027_MB1071c             | non-synonymous | Glu129Gly         |
| 3  | 1619153            | A                | G    | A    | A    | BQ2027_MB1476c / PE_PGRS26 | synonymous     |                   |
| 4  | 1619361            | T                | G    | T    | T    |                            | non-synonymous | Asn354Thr         |
| 5  | 2283587            | G                | T    | G    | G    | BQ2027_MB2074c / pks12     | non-synonymous | Asp3908Glu        |
| 6  | 2283590            | G                | A    | G    | G    |                            | synonymous     |                   |
| 7  | 2283596            | G                | C    | G    | G    |                            | non-synonymous | Phe3905Leu        |
| 8  | 2283598            | A                | G    | A    | A    |                            | non-synonymous | Phe3905Leu        |
| 9  | 2283607            | A                | G    | A    | A    |                            | non-synonymous | Phe3902Leu        |
| 10 | 2283616            | T                | G    | T    | T    |                            | non-synonymous | Thr3899Pro        |
| 11 | 3082946            | T                | A    | T    | T    |                            | intergenic     |                   |
| 12 | 3836507            | T                | C    | T    | T    | BQ2027_MB3495              | synonymous     |                   |
| 13 | 3878929            | G                | C    | G    | G    | BQ2027_MB3537 / PE_PGRS53  | non-synonymous | Lys775Asn         |
| 14 | 3878937            | C                | A    | C    | C    |                            | non-synonymous | Ala778Asp         |
| 15 | 3878946            | T                | A    | T    | T    |                            | non-synonymous | Ile781Asn         |
| 16 | 3878985            | G                | C    | G    | G    |                            | non-synonymous | Gly794Ala         |
| 17 | 3884294            | A                | G    | A    | A    | BQ2027_MB3538 / PE_PGRS54  | non-synonymous | Asp1106Gly        |
| 18 | 3884519            | C                | T    | C    | C    |                            | non-synonymous | Ala118Val         |
| 19 | 3890762            | T                | C    | T    | T    | BQ2027_MB3541 / PE_PGRS55  | synonymous     |                   |
| 20 | 3890767            | G                | C    | G    | G    |                            | non-synonymous | Gly834Ala         |
| 21 | 3893080            | A                | G    | A    | A    |                            | non-synonymous | Asp1605Gly        |
| 22 | 4259281            | T                | C    | T    | T    | intergenic                 |                |                   |

**SNPs  
uniquely  
absent in  
MBE4**

|   |        |   |   |   |   |                                          |  |  |
|---|--------|---|---|---|---|------------------------------------------|--|--|
|   |        |   |   |   |   |                                          |  |  |
| 1 | 928975 | G | G | A | A | BQ2027_<br>MB0857C<br>/<br>PE_PGRS<br>14 |  |  |
| 2 | 928981 | G | G | A | A |                                          |  |  |
| 3 | 928985 | A | A | T | T |                                          |  |  |
| 4 | 928987 | G | G | A | A |                                          |  |  |
| 5 | 928991 | A | A | G | G |                                          |  |  |





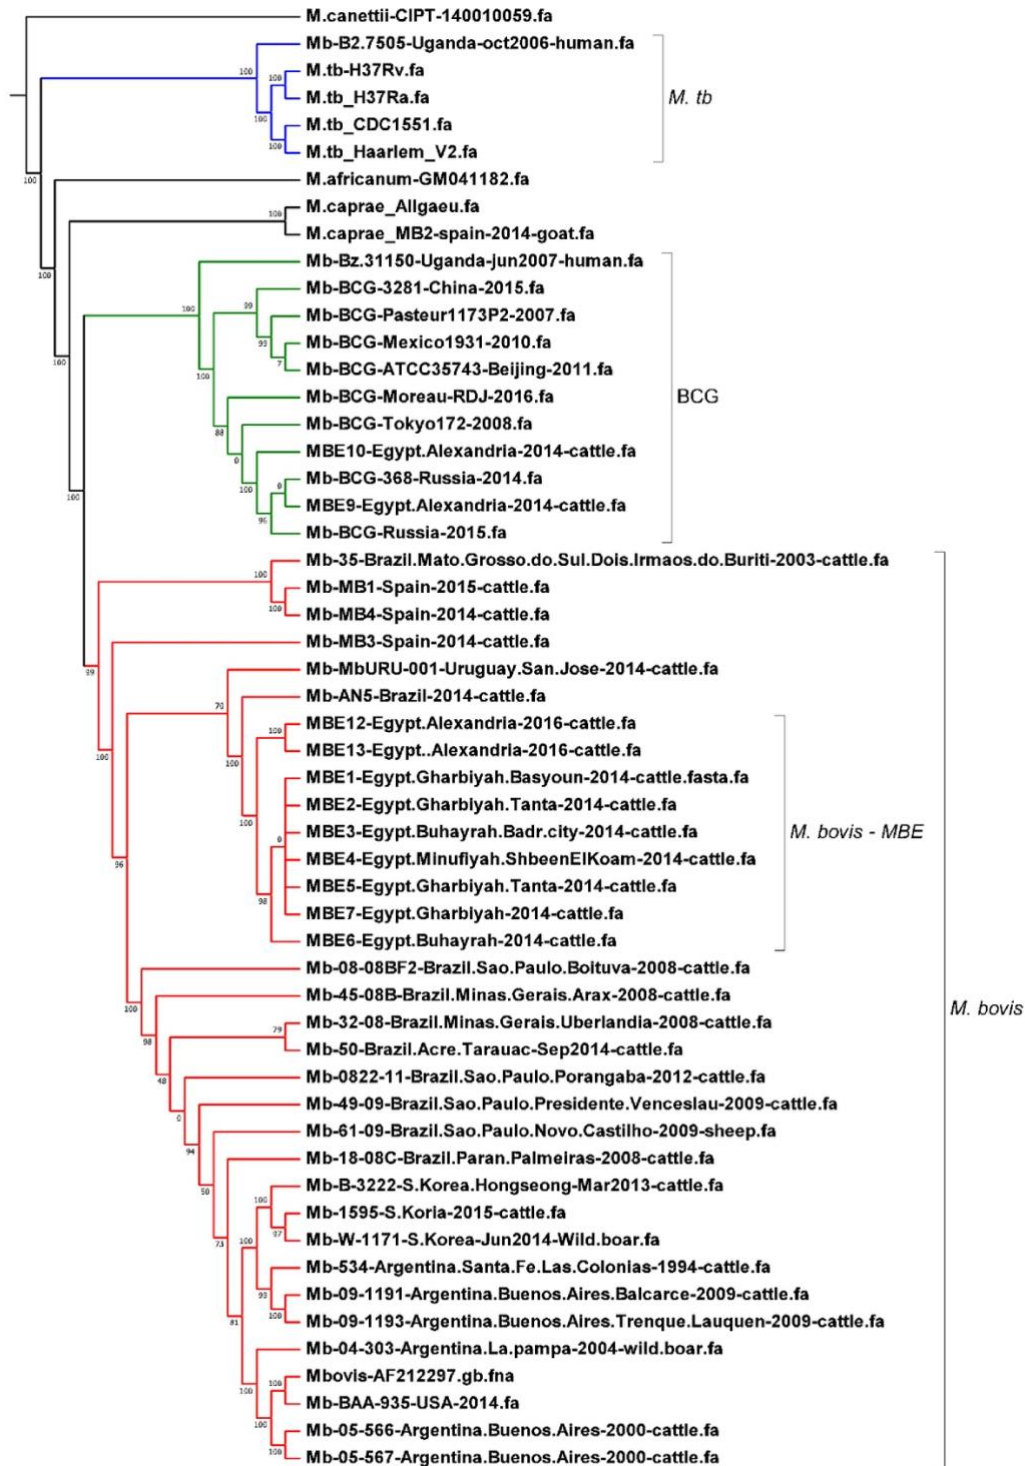

19  
20  
21  
22  
23  
24

**Supplemental Fig. 1.** Phylogenetic tree of MBE isolates and an archive of 67 sequenced *M. bovis* genomes. Whole genome sequences were analyzed with the Jukes-Cantor or generalized time-reversible (GTR) models of nucleotide evolution using Harvest software, and the tree was visualized with MEGA7, each strain identified by ID, origin of isolation, year of isolation, and species of isolation.

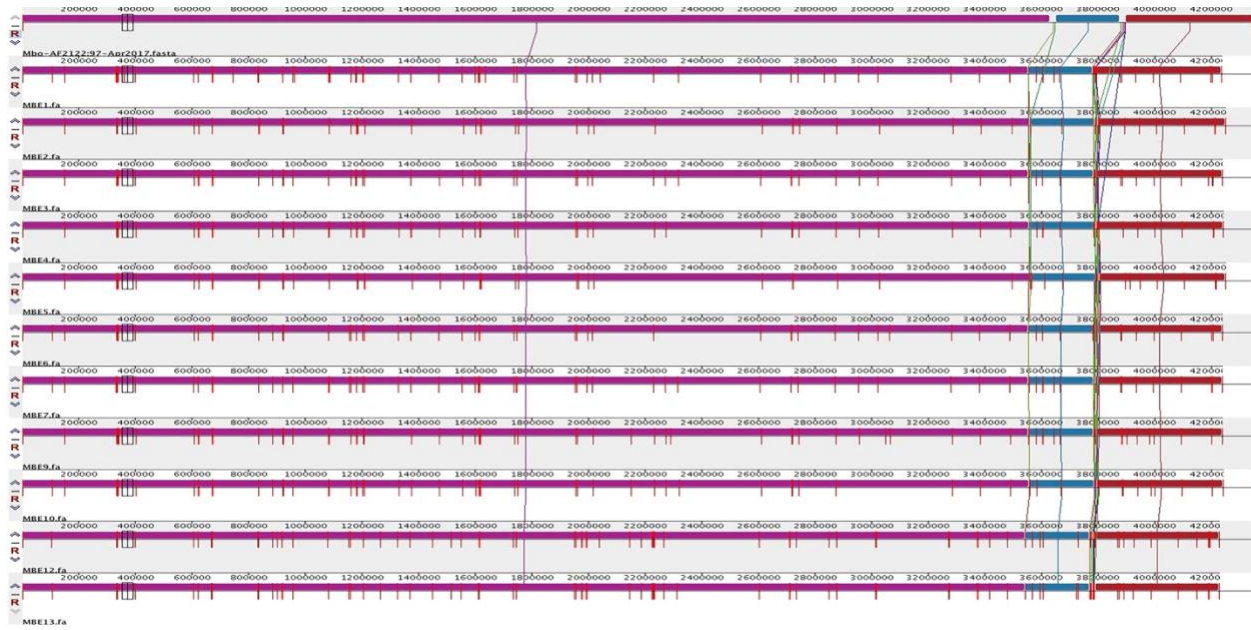

25  
 26 **Supplementary Fig. 2. Core-genome multiple alignment for all the *M. bovis* isolates from**  
 27 **Nile delta, MAUVE alignment showing no major genomic rearrangements.**

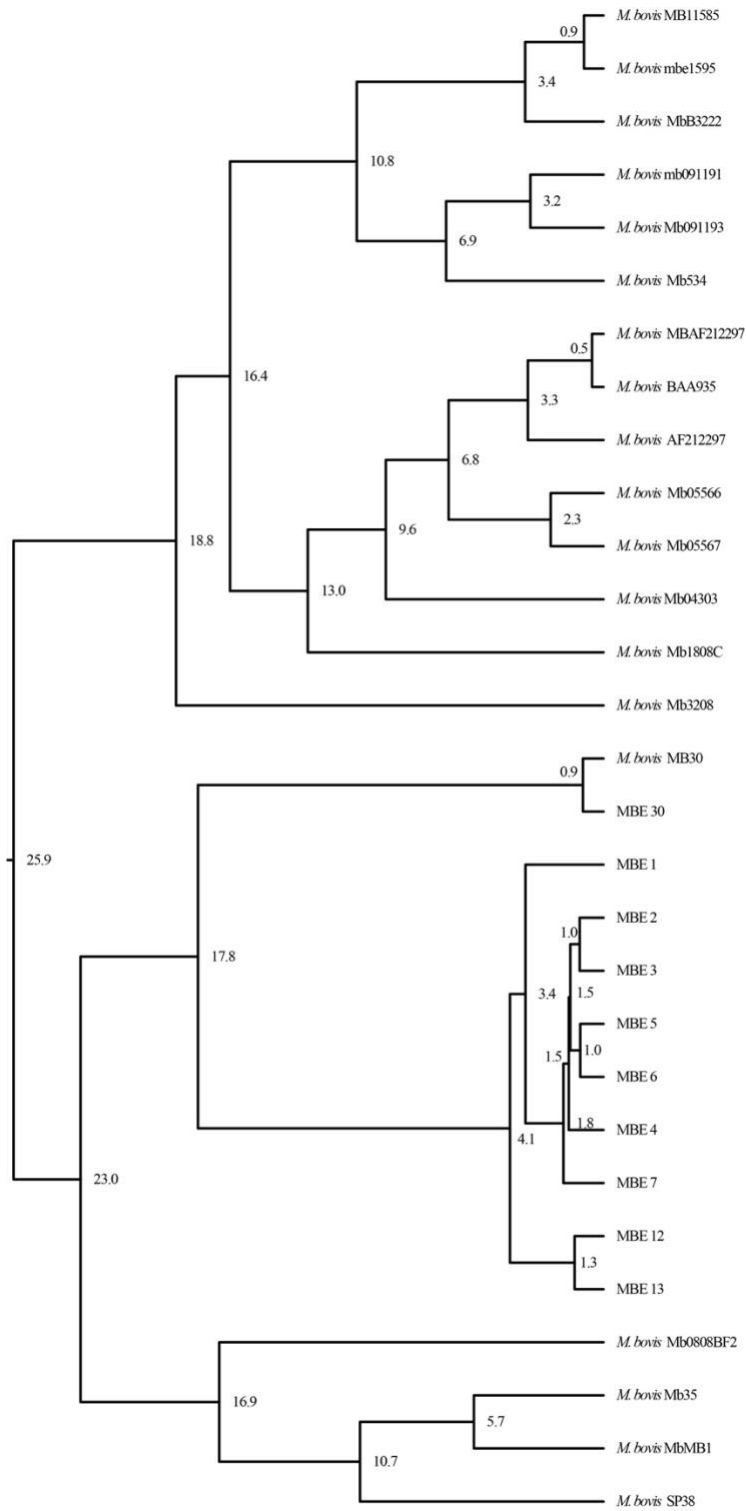

28  
29

**Supplemental Fig. 3.** phylogeographic model of bovine tuberculosis in the Nile Delta.

30 **References.**

- 31 1. Forrellad, M. A. *et al.* Virulence factors of the Mycobacterium tuberculosis complex.  
32 doi:10.4161/viru.22329

33
